# Supplementary material for: A facile and effective strategy to develop a super-hydrophobic/super-oleophilic fiberglass filter membrane for efficient micron-scale water-in-oil emulsion separation
Source: Royal Society of Chemistry journal article supplement (doi:10.1039/d1ra08841f), 2022-01-01
Supplement: d1ra08841f1.pdf [file d1ra08841f1.pdf]

## Supporting information

### A facile and effective strategy to develop the super-hydrophobic / super-oleophilic fiberglass filter membrane for efficient micron-scale water-in-oil emulsions separation

Yujie Zhou <sup>a</sup>, LanTao He <sup>a</sup>, Linxi Wang <sup>a</sup>, Gaoxiang Chen <sup>a</sup>, Jianhong Luo <sup>a\*1</sup>

<sup>a</sup> Department of Chemical Engineering, Sichuan University, Chengdu, Sichuan 610065, P.R. China.

Corresponding author: Jianhong Luo ([luojianhong@scu.edu.cn](mailto:luojianhong@scu.edu.cn))

Table S1. Detailed composition of various MTS@SH-SiO<sub>2</sub>@FGm

| Membrane category | The amount of MTS | The amount of SH-SiO <sub>2</sub> |
|-------------------|-------------------|-----------------------------------|
|                   | added(mM)         | added(g)                          |
| M0                | 15mM              | 0                                 |
| M1                | 15mM              | 0.10                              |
| M2                | 15mM              | 0.15                              |
| M3                | 15mM              | 0.20                              |
| M4                | 15mM              | 0.25                              |
| M5                | 15mM              | 0.30                              |

Table S2. Detailed composition of various emulsions

| Emulsion acronym | Emulsion composition |      |       |        |       |
|------------------|----------------------|------|-------|--------|-------|
|                  | Oil                  |      | water | Span80 | Tween |
| SE-A             | isooctane            | 99mL | 1mL   | 0.02g  | 0     |
| SE-B             | n-Hexane             | 99mL | 1mL   | 0.02g  | 0     |
| SE-C             | cyclohexane          | 99mL | 1mL   | 0.02g  | 0     |
| SE-D             | petroleum ether      | 99mL | 1mL   | 0.02g  | 0     |
| SE-E             | kerosene             | 99mL | 1mL   | 0      | 0.02g |

<sup>1</sup>E-mail address: [luojianhong@scu.edu.cn](mailto:luojianhong@scu.edu.cn)

Table S3. The water content for separated different emulsion.

| Emulsion types | The initial concentration of water in the emulsion (mg/L) | Water content used by trace moisture analyzer (WC%) | The concentration of water in the collected oil (mg/L) |
|----------------|-----------------------------------------------------------|-----------------------------------------------------|--------------------------------------------------------|
| SE-A           | 711910                                                    | 0.0107%                                             | 73.50435                                               |
| SE-B           | 663400                                                    | 0.0212%                                             | 141.487                                                |
| SE-C           | 793090                                                    | 0.0181%                                             | 133.1698                                               |
| SE-D           | 653500                                                    | 0.0092%                                             | 60.89524                                               |
| SE-E           | 802000                                                    | 0.0116%                                             | 90.53043                                               |

Table S4. The water content of MTS@SH-SiO<sub>2</sub>@FGm after each water-in-oil emulsion separation cycle for SE-A

| Cycle index | $C_0$ (mg/L) | WC%    | $C_f$ (mg/L) |
|-------------|--------------|--------|--------------|
| 1           | 711910       | 0.0107 | 73.50435     |
| 2           | 711910       | 0.0148 | 104.887      |
| 3           | 711910       | 0.0208 | 141.9826     |
| 4           | 711910       | 0.0222 | 151.5391     |
| 5           | 711910       | 0.0249 | 173.2174     |
| 6           | 711910       | 0.0241 | 165.0326     |

Table S5. The water content for SE-A emulsion at different temperature conditions

| Temperature | $C_0$ (mg/L) | WC%    | $C_f$ (mg/L) |
|-------------|--------------|--------|--------------|
| 100         | 711910       | 0.0109 | 74.6413      |
| 150         | 711910       | 0.0153 | 103.6227     |
| 200         | 711910       | 0.0123 | 84.05        |
| 250         | 711910       | 0.0188 | 129.1478     |
| 300         | 711910       | 0.0155 | 108.5        |
| 350         | 711910       | 0.0132 | 91.25217     |
| 400         | 711910       | 0.0142 | 100.0174     |

Table S6. The water content for SE-A emulsion at different PH conditions

| PH | $C_0$ (mg/L) | WC%    | $C_f$ (mg/L) |
|----|--------------|--------|--------------|
| 1  | 711910       | 0.0140 | 95.86957     |
| 3  | 711910       | 0.0155 | 107.0909     |
| 5  | 711910       | 0.0139 | 96.35227     |
| 7  | 711910       | 0.0178 | 120.5545     |
| 10 | 711910       | 0.0172 | 117.2727     |
| 12 | 711910       | 0.0225 | 155.8125     |
| 14 | 711910       | 0.0228 | 155.9727     |

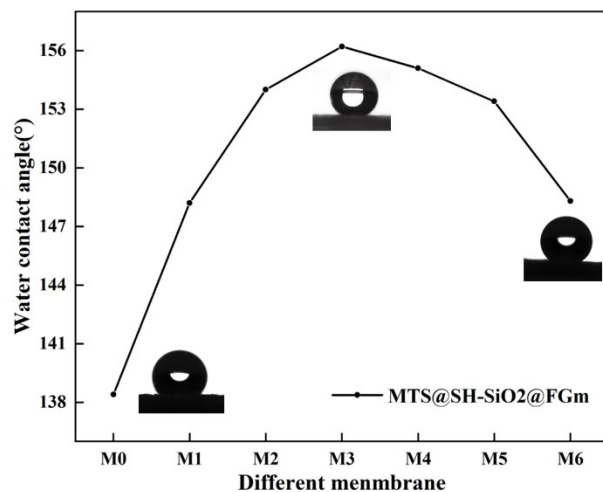

Fig. S1. Water content angle of different MTS@SH-SiO<sub>2</sub>@FGm

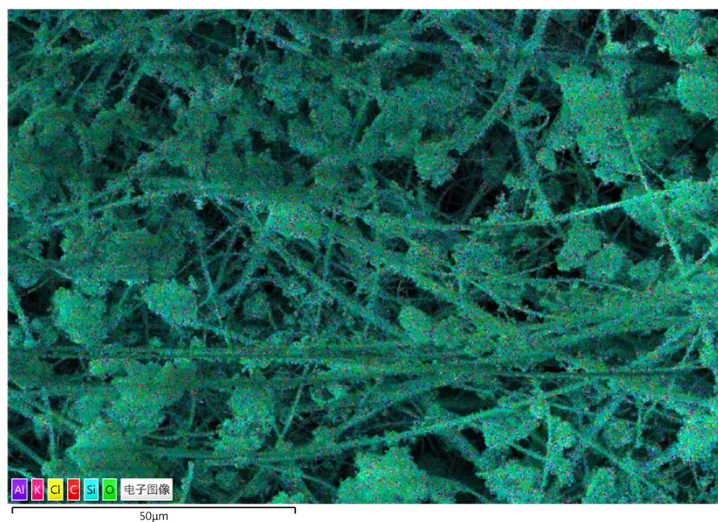

Fig. S2. The corresponding EDS mapping for MTS@SH-SiO<sub>2</sub>@FGm.

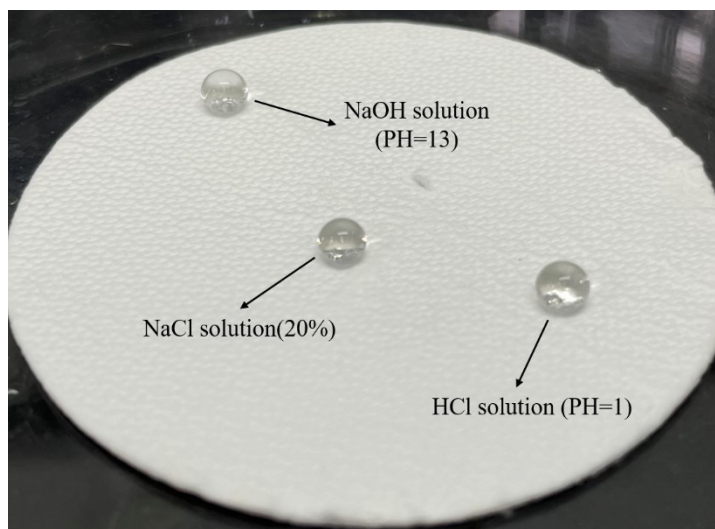

Fig. S3. Photograph of various water droplets (pure water, HCl solution, and NaOH solution) on the surface of MTS@SH-SiO<sub>2</sub>@FGm

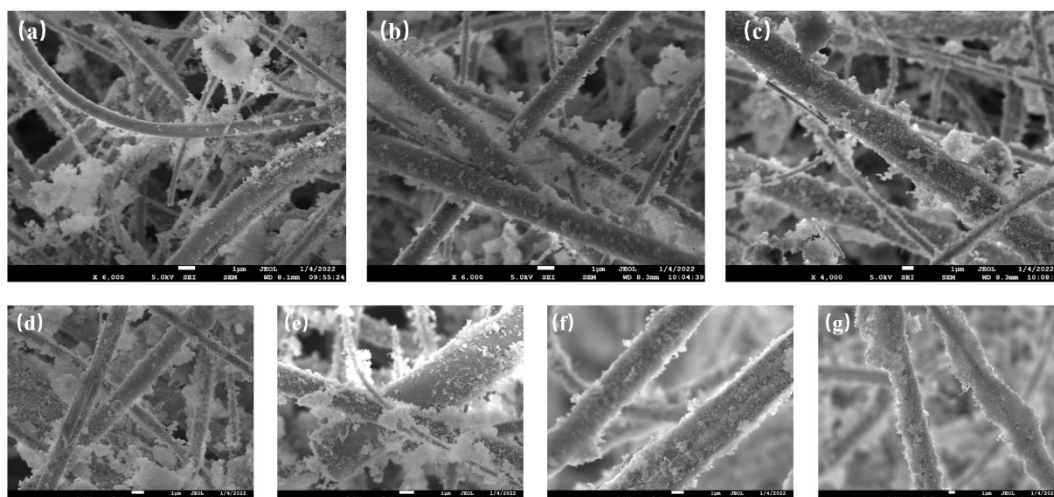

Fig. S4. The SEM images showing the morphology of modified membrane which was placed in into muffle furnace at different temperature ranging from (a) 100 °C, (b) 150°C, (c) 200°C, (d) 250°C, (e) 300°C, (f) 350 °C and (g) 400°C.
